# Supplementary material for: Astaxanthin stimulates mitochondrial biogenesis in insulin resistant muscle via activation of AMPK pathway
Source: PubMed Central journal article supplement (PMC7015247; doi:10.1002/jcsm.12530), 2020-01-31
Supplement: JCSM-11-241-s001.pdf [file JCSM-11-241-s001.pdf]

Table S1: SYBR Green primers sequence

| Gene Name                   | Fw. Seq.                  | Rv. Seq.                 |
|-----------------------------|---------------------------|--------------------------|
| Abhd5 (Cgi-58)              | GACACCAGGTAGGAAGCCAC      | GCTTCGAGGTGTGTCCCTG      |
| Acacb                       | TGTTCTCGGCCTCTCTCAC       | GAGGCTGCATTGAACACAAG     |
| Accox1                      | GGAATTTGGCATCGCAGACC      | ACATGCCCAAGTGAAGGTCC     |
| Accox3                      | GCTCGGTAGGCACTAAGAGG      | CTTCTGAGAAAACGGGGACAA    |
| AMPK $\alpha$ 1 (Prkaa1)    | ACCAGGTATCAGTACACCA       | TCCTTTTCGTCCAACTTCCA     |
| AMPK $\alpha$ 2 (Prkaa2)    | GGCAAAGTGAAGACTACCAGG     | CTTCAACCCGCCCATGTTTG     |
| Angptl4                     | GCTCATTGGCTTGACTCCCA      | GCCTCCATCTGAAGTCACTCA    |
| aP2                         | GATGCCTTTGTGGGAACCTG      | GAATCCACGCCCACTTTGA      |
| Arf1                        | GGAGGTCTTTGGCCAGTATCG     | ACATTGAAACCAATGGTGGGA    |
| Arfrp1                      | GGATGTACACGCTGCTTTG       | GTGCCAATGTTAGACCACAG     |
| Atrogin-1 (Fbxo32)          | CTCAGGGATGTGAGCTGTGA      | GGGGGAAGCTTTCAACAGAC     |
| $\beta$ -actin              | GCCGGGACCTGACAGACTAC      | AACCGCTGTTGCCAATAGT      |
| Bdnf                        | GACGTTTACTCTTTTCATGGGC    | TGAGTCTCCAGGACAGCAAA     |
| Bmp1                        | TAGTCATACCAGCACAGGCG      | CTACTGCCCCACATGCACT      |
| Cox7rp                      | TTTGGTTGGTGTGGCAATA       | AGTTTCACGCAGAAAGTTGGC    |
| Cpt1a                       | TTGGAAGTCTCCCTCCTTCA      | GCCCATGTTGTACAGCTTCC     |
| Cs                          | AAGGACGAGGCAGGATGAG       | TGCAGCTGTAGCTCTCTCCC     |
| Epas1 (Hif2a)               | CATCACGGGATTTCTCTTC       | AGGGCCACAGCAAAAGAGAG     |
| Erra                        | CAGCTGTAAGCTGATGCTCC      | AGCTCTTACCCAAACGCCT      |
| Errb                        | TGAAGGAGCCGCAACTAGAG      | GCTGGAACACCTGAGGGTAA     |
| Errg (Nr3b3)                | TTGTACTTCTGCCGACCTCC      | TGAGATCACAAGCGCAGAC      |
| Fabp-3                      | CCGTTCTTCTCGATGATGGT      | CGGTACCTGGAAGCTAGTGG     |
| Fabp4                       | AAATCACCGCAGACGACAGG      | ATAACACATTCCACCACCAGC    |
| Fabp4                       | AAATCACCGCAGACGACAGG      | ATAACACATTCCACCACCAGC    |
| Fam132b (Ctrp15, Myonectin) | TGCTTGATGCTGTTCTGCTAA     | CAGATGGGATAAAGGGGCCTG    |
| Flt1 (Vegfr1)               | TGCTGGGTGCCTTTTAAACT      | ATGGTACGCTGCTGGGAC       |
| Fst (Follistatin)           | GACAATGCCACATACGCCAG      | GTTTCTCCGAGATGGAGTTGC    |
| Fst1                        | GCCAGCTCCACAAAACACAT      | GAGCACAGATGTGGAACAGAT    |
| Gbf1                        | TCCAGAAATGGACGAAGGAA      | CACTGGATGAAGAACGGGAT     |
| Glut4 (slc2a4)              | CAGTGTCCAGTCACTCGCT       | CAGCGCTGAGTCTTTTCTT      |
| Got2 (Fabpm)                | ACTTGGGAAGCAATGGTTG       | GTGATGTGCTGCCAGTTGTG     |
| Gpi1                        | AATGGAAAGTCCAATGGCTG      | ACTTTGTGCCCCTGTCTACG     |
| H6pd (G6pd)                 | TGCTGATGTTGAGAGGCAGT      | GGAGACCATAGATGCGGAA      |
| Idh1                        | CTCTGCAGCATCTTTGGTGA      | TGACACGAATCATTGGGAA      |
| Il6ra                       | ACCAGGTGATCATTGAGGGA      | TGGGTGACTCTGGCTCACA      |
| Ins16                       | GATTCACAAAACCCAGTCCCTG    | CCTTAGGAAGCAACTCCGTCT    |
| Kdr (Vegfr2)                | TCCAGAATCCTCTTCCATGC      | CCAGAGACCCTCGTTTTCAG     |
| Lif                         | GACCACGGCTCCAGTATATAAATC  | GCAGCAGTAAGGGCACAAATC    |
| Mmp2                        | CAGGGCACCTCTACAACAG       | CAGTGGACATAGCGGTCTCG     |
| Mstn                        | GAGCCCAGGCACTGGTATTT      | AGGGATTGAGCCCATCTTCTC    |
| MtDNA1                      | CCGCAAGGGAAAGATGAAAGAC    | TCGTTTGGTTTCGGGGTTTC     |
| Myh3                        | GACTCAGCCGACCCATGAG       | CTCTGGCTTAACCACCAGGG     |
| MyHCl (Myh7 Slow)           | CTCAGGTGGCTCCGAGAAAG      | TGGCTGAGCCTTGGAATCTC     |
| MyHCl $\alpha$ (Myh2)       | GCAAGAAAGCAGATCCAGAAAC    | GGTCTTCTCTGTCTGTAAGTAAGC |
| MyHCl $\beta$ (Myh4 Fast)   | TCTGGTAACACAAGAGGTGC      | AAAAGGCTTGTCTGGGCCT      |
| MyHCl $\gamma$ (Myh1 Mod)   | GCAACAGGAGATTTTGCACCTCAC  | CCAGAGATGCCTCTGCTTC      |
| Mylpf                       | GTATGTTAAGGGCTGCCGGG      | TTACAGTGAACGCCCTCTTGA    |
| MyoG                        | GTGAATGCAACTCCACAGC       | CGCGAGCAATGATCTCCTG      |
| Nlrp3                       | GGACCAGCCAGAGTGAATGA      | AACCTGCTTCTCACATGCTGT    |
| Nos3 (eNOS)                 | GTTGTACGGGCTGACATTT       | GGTCTGTGCATGGATGAG       |
| Pck2                        | TGTACCATAAACCTCGTGGC      | GTGGTACCCCTTTGGGTCG      |
| PCK2                        | TGTACCATAAACCTCGTGGC      | GTGGTACCCCTTTGGGTCG      |
| Pfkfb3                      | CCACCATCACAATCACGGT       | ACAGCTACGAAGATGCCGTT     |
| Pfkm                        | GCCCCGTAAGATACCAACTC      | CCATGAAAGACATATGCAAG     |
| Pgc1-1a                     | AGCCGTGACCACTGACAACGAG    | GCTGCATGGTTCTGAGTCTAAG   |
| Pgc-1a total_Sp             | TGATGTGAATGACTGGATACAGACA | GCTCATTTGTTACTGGTTGGATG  |
| Pgc1a-1                     | GGACATGTGCAGCCAGACTCT     | CACCTCAATCCACCAGAAAAGCT  |
| Pgc1a-2                     | CCACCAGAATGAGTACATGGA     | GTTACAGCAAGATCTGGGCAAA   |
| Pgc1a-3                     | AAGTGAGTAAACCGGAGGCATTC   | TTCAGGAAGATCTGGGCAAAA    |
| Pgc1a-4                     | TCACACCAAAACCCACAGAAA     | CTGGAAGATATGGCACAT       |
| Pgc1a-a                     | GGGACATGTGCAGCCAAGA       | AAGAGGCTGGTCTCACCAA      |
| Pgc1a-b                     | GACATGGATGTTGGGATTGTCA    | ACCAACCAGAGCAGCACATTT    |
| Pgc1a-c                     | TGAGTAACCGGAGGCATTTCTCT   | TGAGGACCCGTAGCAAGTTTG    |
| Pgc-1 $\beta$               | TCCTGTAAGGACCCGGAGTAT     | GCTCTGGTAGGGGAGTGA       |
| Pkm2                        | TCGCATGCAGCACCTGATT       | CCTCGAATAGCTGCAAGTGGTA   |
| Plin1                       | GGTGTACAGCGTGGAGAGTAA     | TCTGGAAGCACTCACAGGTC     |
| Plin2 (Adfp)                | CAGCTCTCCTGTTAGGCGT       | CGGAGGACACAAGGTCGTAG     |
| Plin3                       | TACTTTGTCCGGTTGGGCTC      | GATTCATCAGGCCGAGCA       |
| Plin4                       | GAGGGACCCCTTACCCTGAC      | CTCAAGGCTTGGCTTTGGAT     |
| Plin5 (Oxpat)               | CCATCAGACATGGTGGTGACA     | GCTAGCTCAGCCTCAGTCAT     |
| Scd1                        | GCCGAGCCTTGTAAAGTTCTG     | CCTCTGCAAGCTCTACACC      |
| Sec23a                      | CACGGAGCTTCTAGACAGAAAT    | ATTCCAACCTGAACCCGACCC    |
| Sirt2                       | GGCTCAGGATTACAGACTCGG     | GCTCGTCTAGAAGACGCTCC     |
| Sirt5                       | ACAGGGCGGTTAAGAAGTCC      | GGCCGAGTTTAAACATGGAGA    |
| Sirt6                       | ACCCACAAAACATGACCGCC      | TTTGTCTAGCACGCGAGGTC     |
| Sirt7                       | CCGTCGACCCAAACTCTACA      | CTGCCACCGGTTGTAGACAG     |
| Sparc (Osteonectin)         | CCAGGCAAGGAGAAAGAAG       | ATTCTGCAGCCCTTCAGAC      |
| Srebp2                      | GATGATACCCCGACGTTCA       | TGCAGGACTTGAAGCTGGT      |
| SRF                         | GCAGTATGTATGCCCCAC        | CAGCCATCTGGTGAAGCTGAA    |
| Stars (Abra)                | GGCTACGGAGGGGATATGGA      | CAGAGTACCTGTTTGCCTGGG    |
| Tf2b                        | TGGAGATTTGTCCACCATGA      | GAATTGCCAAACTCATCAAACCT  |
| Ucp2                        | TGGAATAACGAGGGGATCGG      | GGAGAAACGGGGACCTTCAA     |
| VE-cadherin                 | ACGGACAAGATCAGCTCCTC      | TCTCTTATCGATGTGCATT      |
| Vegfa                       | AAAACGAAAGCGCAAGAAA       | TTTCTCCGCTCTGAACAAGG     |
| Vegfb                       | ACACCAAGTCCGAATGCAGAT     | GTATGGCAACCTGTCTGGCT     |
